# Supplementary material
Source: publisher figshare collection journal article supplement (https://acs.figshare.com/ndownloader/files/4472848)
Supplement: Supplementary file 1 [file 4472848]

# Dynamic Theory of Type 3 Liquid Junction Potentials: Formation of Multi-Layer Liquid Junctions - Supporting Information.

Kristopher R. Ward, Edmund J. F. Dickinson and Richard G. Compton\*

\*Corresponding author

Department of Chemistry, Physical and Theoretical Chemistry Laboratory, Oxford University,  
South Parks Road, Oxford, United Kingdom OX1 3QZ. Fax: +44 (0) 1865 275410;  
Tel: +44 (0) 1865 275413. Email: richard.compton@chem.ox.ac.uk

## A: THE ITERATIVE NEWTON-RAPHSON METHOD

The iterative Newton-Raphson method is a standard numerical procedure for solving a system of coupled non-linear simultaneous. The  $n$  equations are written in an homogeneous form:

$$f_n(x_0, x_1, \dots, x_n) = 0 \quad (1)$$

Let  $\vec{x}$  be the vector containing the unknowns  $x_0$  to  $x_n$ ; let  $\vec{f}(\vec{x})$  be the vector containing the functions  $f_0$  to  $f_n$ ; and let  $\vec{u}$  be the vector containing the differences between  $\vec{x}$  at consecutive iterations, such that

$$\vec{u} = \vec{x}_{z+1} - \vec{x}_z \quad (2)$$

In the simple Newton-Raphson method, the Taylor series of a function about a trial solution  $x_0$  is considered:

$$f(x) \approx f(x_0) + (x - x_0)f'(x_0) = 0 \quad (3)$$

and hence the solution  $x$  may be derived from successive iterations of the form:

$$x_{z+1} = x_z - \frac{f(x_z)}{f'(x_z)} \quad (4)$$

For a function of multiple variables, a trial vector  $\vec{x}_0$  may be altered similarly:

$$f(\vec{x}) \approx f(\vec{x}_0) + \sum_n (x_n - x_{n,0}) \frac{\partial f(\vec{x}_0)}{\partial x_n} \quad (5)$$

and hence, defining  $u_n = x_n - x_{n,0}$

$$\sum_n u_n \frac{\partial f(\vec{x}_0)}{\partial x_n} = -f(\vec{x}_0) \quad (6)$$

Where there are  $n$  simultaneous equations associated with the  $n$  variables, this may be extended, such that for each variable  $m$ :

$$\sum_n u_n \frac{\partial f_m(\vec{x}_0)}{\partial x_n} = -f_m(\vec{x}_0) \quad (7)$$

which may be expressed for the vectors  $\vec{u}$  and  $\vec{f}$  in the matrix form:

$$\vec{J}(\vec{x}_0)\vec{u} = -\vec{f}(\vec{x}_0) \quad (8)$$

Where  $\vec{J}$  is the Jacobian matrix, being the  $n \times n$  square matrix for which the element  $J_{mn}$  is described:

$$J_{mn} = \frac{\partial f_m}{\partial x_n} \quad (9)$$

i.e. equation 8 is a matrix equation of the form:

$$\begin{pmatrix} \frac{\partial f_0}{\partial x_0} & \frac{\partial f_0}{\partial x_1} & \frac{\partial f_0}{\partial x_2} & \dots & \frac{\partial f_0}{\partial x_n} \\ \frac{\partial f_1}{\partial x_0} & \frac{\partial f_1}{\partial x_1} & \frac{\partial f_1}{\partial x_2} & \dots & \frac{\partial f_1}{\partial x_n} \\ \vdots & \vdots & \vdots & \ddots & \vdots \\ \frac{\partial f_n}{\partial x_0} & \frac{\partial f_n}{\partial x_1} & \frac{\partial f_n}{\partial x_2} & \dots & \frac{\partial f_n}{\partial x_n} \end{pmatrix} \begin{pmatrix} (x_0 - x_{0,0}) \\ (x_1 - x_{1,0}) \\ \vdots \\ (x_n - x_{n,0}) \end{pmatrix} = \begin{pmatrix} -\vec{f}_0(\vec{x}_0) \\ -\vec{f}_1(\vec{x}_0) \\ \vdots \\ -\vec{f}_n(\vec{x}_0) \end{pmatrix} \quad (10)$$

This equation is solved iteratively and  $\vec{x}$  is augmented by  $\vec{u}$ , until all values  $u_0$  to  $u_n$  are less than a characteristic parameter  $\epsilon$ , at which point  $\vec{x}$  is taken as the trial vector for the next timestep. The equation can be solved by an adapted Thomas Algorithm method (LU decomposition followed by back substitution) as the Jacobian is a diagonal matrix with a minimum of fifteen non-zero diagonals for a Type 3 LJP simulation when unknowns  $x_n$  are appropriately ordered (e.g.  $c_{A,0}$ ,  $c_{X,0}$ ,  $\phi_0$ ,  $c_{B,0}$ ,  $c_{Y,0}$ ,  $c_{A,1}$ ,  $c_{X,1}$ ,  $\phi_1$ , etc).
